# Supplementary material for: Influence of curcumin supplementation on metabolic and lipid parameters of people living with HIV/AIDS: a randomized controlled trial
Source: PubMed Central journal article supplement (PMC6685220; doi:10.1186/s12906-019-2620-7), 2019-08-06
Supplement: 12906_2019_2620_MOESM1_ESM.pdf [file 12906_2019_2620_MOESM1_ESM.pdf]

Projeto

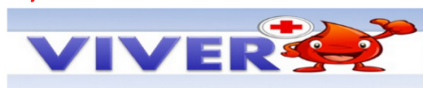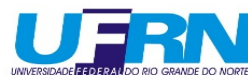

FEDERAL UNIVERSITY OF RIO GRANDE DO NORTE  
CENTER OF HEALTH SCIENCES  
VIVER+ RESEARCH PROJECT

**EVALUATION FORM**

**Anamnesis**

Name: \_\_\_\_\_ ID Code: \_\_\_\_\_

Birth date / Age (years): \_\_\_\_\_ Evaluation date: \_\_\_\_\_

Diagnostic time (HIV/AIDS): \_\_\_\_\_ ART Therapy Time: \_\_\_\_\_

Current ART Combination: \_\_\_\_\_

For how long has it been in use? \_\_\_\_\_

Comorbidities \_\_\_\_\_

Other medications in use: \_\_\_\_\_

Work ( ) Yes ( ) No

Alcohol consumption ( ) Yes ( ) No

Smoke? ( ) Yes ( ) No

Education level: ( ) Middle school ( ) High School ( ) College

Family income: \_\_\_\_\_
